# Supplementary material for: A THEMIS:SHP1 complex promotes T-cell survival
Source: PubMed Central journal article supplement (PMC4339124; doi:10.15252/embj.201387725), 2014-12-22

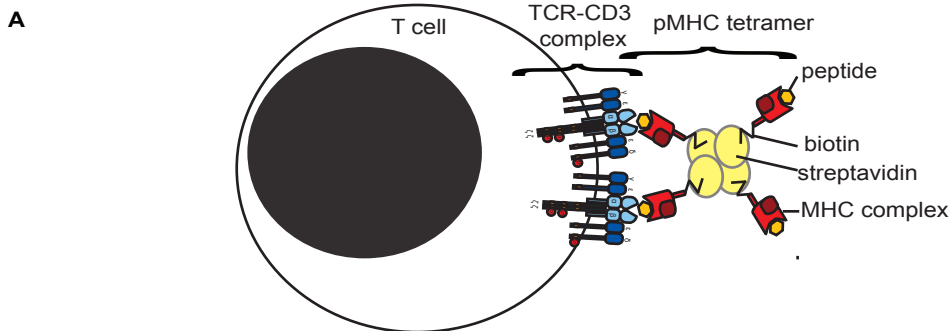

| NY-ESO-1 <sub>157-165</sub> pMHC |                  | $K_D$<br>( $\mu\text{M}$ ) | $k_{\text{off}}$<br>( $\mu\text{M}$ ) | $k_{\text{on}}$<br>$\times 10^3$ ( $\text{M}^{-1}\text{s}^{-1}$ ) | $t_{1/2}$<br>(s) | $\Delta G$<br>( $\text{kcal mol}^{-1}$ ) | EC50 (IFN- $\gamma$ )<br>( $\mu\text{g/ml pMHC}$ ) |
|----------------------------------|------------------|----------------------------|---------------------------------------|-------------------------------------------------------------------|------------------|------------------------------------------|----------------------------------------------------|
| peptide name                     | peptide sequence |                            |                                       |                                                                   |                  |                                          |                                                    |
| 9C (wt)                          | SLLMWITQC        | $14 \pm 1$                 | $0.82 \pm 0.01$                       | $57 \pm 3$                                                        | $0.84 \pm 0.01$  | $-6.9 \pm 0.0$                           | $115 \pm 14$                                       |
| 9V                               | SLLMWITQV        | $7.2 \pm 0.5$              | $0.33 \pm 0.01$                       | $45 \pm 4$                                                        | $2.12 \pm 0.08$  | $-7.3 \pm 0.0$                           | $180 \pm 19$                                       |
| 6V                               | SLLMWVTQV        | $18 \pm 0$                 | $0.85 \pm 0.03$                       | $49 \pm 2$                                                        | $0.81 \pm 0.03$  | $-6.8 \pm 0.0$                           | $45 \pm 5$                                         |
| 9L                               | SLLMWITQL        | $56 \pm 6$                 | $0.93 \pm 0.05$                       | $17 \pm 2$                                                        | $0.74 \pm 0.04$  | $-6.0 \pm 0.1$                           | $426 \pm 113$                                      |
| 4D                               | SLLDWITQV        | $252 \pm 12$               | $2.59 \pm 0.15$                       | $10 \pm 1$                                                        | $0.27 \pm 0.02$  | $-5.1 \pm 0.0$                           | $2.3 \pm 0.5$                                      |

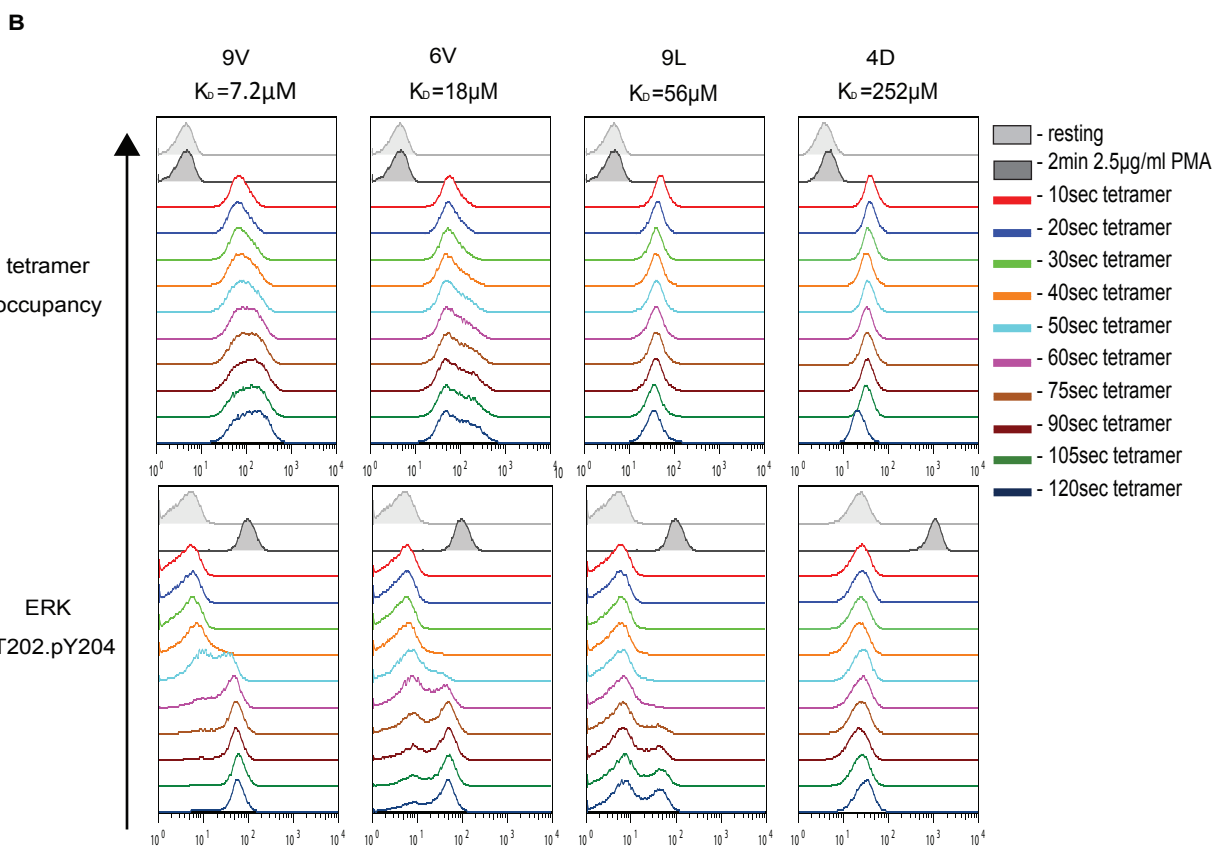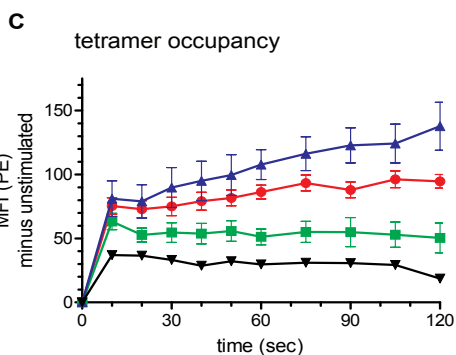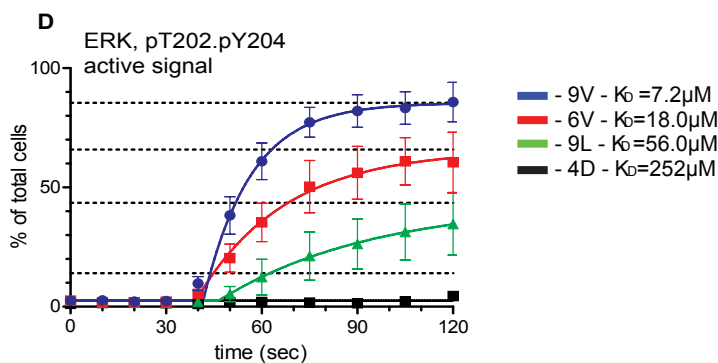

Supplement: embj0034-0393-sd2.pdf [file embj0034-0393-sd2.pdf]
