# Supplementary material for: A THEMIS:SHP1 complex promotes T-cell survival
Source: PubMed Central journal article supplement (PMC4339124; doi:10.15252/embj.201387725), 2014-12-22

**A**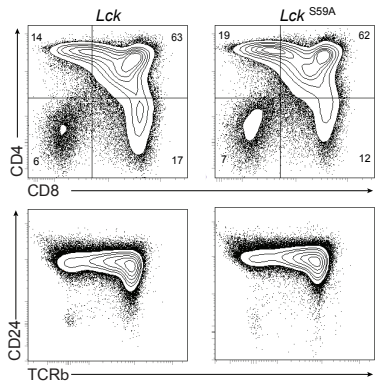**B**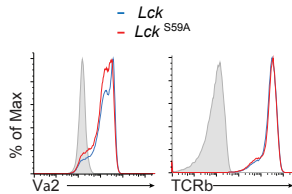**C**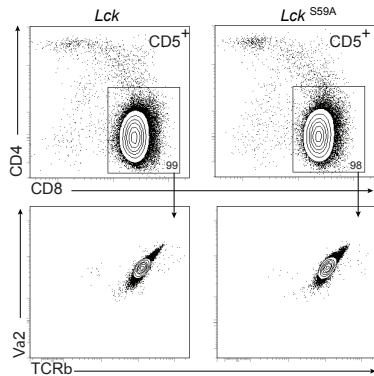

Supplement: embj0034-0393-sd7.pdf [file embj0034-0393-sd7.pdf]
