# Supplementary material for: A THEMIS:SHP1 complex promotes T-cell survival
Source: PubMed Central journal article supplement (PMC4339124; doi:10.15252/embj.201387725), 2014-12-22
Supplement: embj0034-0393-sd9.pdf [file embj0034-0393-sd9.pdf]

**Supplementary Table I. Individual peptides identified in THEMIS PD**

| <b>THMS1_HUMAN</b> |                    |                                   |                            |
|--------------------|--------------------|-----------------------------------|----------------------------|
| <b>Position</b>    | <b>Probability</b> | <b>Sequence / Charge / PTM</b>    | <b>Number of instances</b> |
| 2-15               | 0.9999             | ALSLEEFVHSLDLR                    | 10                         |
| 88 - 103           | 0.9999             | IVADKTPYLTMEEITR                  | 6                          |
| 93 - 103           | 0.9999             | TPYLTMEEITR                       | 6                          |
| 104 - 111          | 0.9999             | TIHIGPSR                          | 8                          |
| 112 - 121          | 0.9999             | LGHPCFYHQK                        | 8                          |
| 125 - 131          | 0.9999             | LENLIK                            | 1                          |
| 157 - 180          | 0.9999             | NHQTHSFNPLSQEGEFYECEDER           | 3                          |
| 199 - 217          | 0.9999             | TVNLTFDSNKKWDSTNPPFK              | 2                          |
| 209 - 217          | 0.9999             | WDSTNPPFK                         | 2                          |
| 218 - 236          | 0.9999             | DFYGTLLKPVVEIQGVMK                | 5                          |
| 244 - 253          | 0.9999             | ILPSLDVEVK                        | 6                          |
| 280 - 305          | 0.9999             | EFPIVTEVIEAPEGNHLPOSILQPGK        | 5                          |
| 306 - 312          | 0.9999             | TIVIHKK                           | 5                          |
| 318 - 324          | 0.9999             | ILASEIR                           | 4                          |
| 330 - 339          | 0.9999             | RHFLIPTSYPK                       | 4                          |
| 331 - 339          | 0.9999             | HFLIPTSYPK                        | 4                          |
| 348 - 359          | 0.9999             | EFPTAYDLEIAK                      | 3                          |
| 360 - 371          | 0.9999             | SEKEPLHVVATK                      | 11                         |
| 372 - 379          | 0.9999             | AFHSPHDK                          | 4                          |
| 372 - 405          | 0.9999             | AFHSPHDKLSSVSGDQFLVHQSETTEVLCEGIK | 2                          |
| 380 - 405          | 0.9999             | LSSVSGDQFLVHQSETTEVLCEGIK         | 2                          |
| 407 - 415          | 0.9999             | VVNLACEK                          | 1                          |
| 419 - 441          | 0.9999             | KSYEAALLPLYMEGGFVEVIHDK           | 2                          |
| 420 - 441          | 0.9999             | SYEAALLPLYMEGGFVEVIHDK            | 4                          |
| 420 - 442          | 0.9999             | SYEAALLPLYMEGGFVEVIHDKK           | 2                          |
| 443 - 451          | 0.9999             | QYPISELCK                         | 5                          |
| 509 - 521          | 0.9999             | LNMTVQLVSNFSR                     | 7                          |
| 522 - 529          | 0.9999             | DAEPFLVR                          | 5                          |
| 530 - 544          | 0.9999             | TLVEEITEEQYMMMR                   | 8                          |
| 545 - 559          | 0.9999             | RYESSASHPPRPPK                    | 9                          |
| 546 - 559          | 0.9999             | YESSASHPPRPPK                     | 12                         |
| 546 - 567          | 0.9999             | YESSASHPPRPPKHPSVEETK             | 5                          |
| 560 - 567          | 0.9999             | HPSVEETK                          | 5                          |
| 560 - 577          | 0.9999             | HPSVEETKLLTLAEER                  | 1                          |
| 587 - 594          | 0.9999             | RHHVDITK                          | 3                          |
| 588 - 594          | 0.9999             | HHVDITK                           | 3                          |
| 588 - 595          | 0.9997             | HHVDITKK                          | 2                          |
| 595 - 606          | 0.9999             | KLHPNQAGLDSK                      | 17                         |
| 596 - 606          | 0.9999             | LHPNQAGLDSK                       | 4                          |
| 607 - 620          | 0.9999             | VLIGSQNDLVDEEK                    | 6                          |
| 607 - 622          | 0.9999             | VLIGSQNDLVDEEKER                  | 8                          |
| <b>GRB2_HUMAN</b>  |                    |                                   |                            |
| 11-20              | 0.9999             | ATADDELSFK                        | 2                          |
| 27 - 38            | 0.9999             | VLNEECDQNWYK                      | 2                          |
| 39 - 50            | 0.9999             | AELNGKDGFIK                       | 1                          |
| 51 - 64            | 0.9999             | NYIEMKPHPWFFGK                    | 1                          |
| 68 - 76            | 0.9999             | AKAEEMLSK                         | 3                          |
| 101 - 109          | 0.9999             | FGNDVQHFK                         | 1                          |
| 118 - 124          | 0.9999             | YFLWVVK                           | 2                          |
| 125 - 136          | 0.9999             | FNSLNELVDYHR                      | 1                          |
| 196 - 207          | 0.9999             | GACHGQTGMFPR                      | 6                          |
| <b>PTN11_HUMAN</b> |                    |                                   |                            |
| 6-23               | 0.9999             | WFHPNITGVEAENLLTR                 | 1                          |
| 130 - 138          | 0.985              | GKHGSFLVR                         | 1                          |
| 167 - 173          | 0.9999             | VTHVMIR                           | 1                          |
| 179 - 186          | 0.9999             | YDVGGGER                          | 1                          |
| 236 - 244          | 0.9998             | LAETTDKVK                         | 1                          |
| 281 - 289          | 0.9994             | NILPFDHTR                         | 1                          |
| 390 - 399          | 0.9999             | ESAADHYTLR                        | 1                          |
| <b>PTN6_HUMAN</b>  |                    |                                   |                            |
| 10-21              | 0.9999             | DLSGLDAETLLK                      | 2                          |
| 47 - 55            | 0.9999             | VGQVTHIR                          | 1                          |
| 130 - 138          | 0.9999             | GEPWTFIVR                         | 1                          |
| 295 - 310          | 0.9677             | DSNIPGSDYINANYIK                  | 1                          |
| 524 - 532          | 0.9999             | KLEVLQSQK                         | 2                          |
| <b>COR1A_HUMAN</b> |                    |                                   |                            |
| 384 - 393          | 0.9999             | DAGPLLSLK                         | 1                          |
| 439 - 449          | 0.9999             | KLQATVQELQK                       | 3                          |
| 454 - 461          | 0.9688             | LEETVQAK                          | 1                          |
| <b>M1IP1_HUMAN</b> |                    |                                   |                            |
| 12-20              | 0.896              | HSLFNAMNR                         | 1                          |
| 86 - 95            | 0.9999             | DMYSHYVLLK                        | 1                          |
| 153 - 160          | 0.9999             | GLHTVLSK                          | 1                          |
